# Supplementary material
Source: publisher figshare collection journal article supplement (https://frontiersin.figshare.com/ndownloader/files/28809813)
Supplement: Supplementary file 1 [file 28809813]

## Supplementary Material

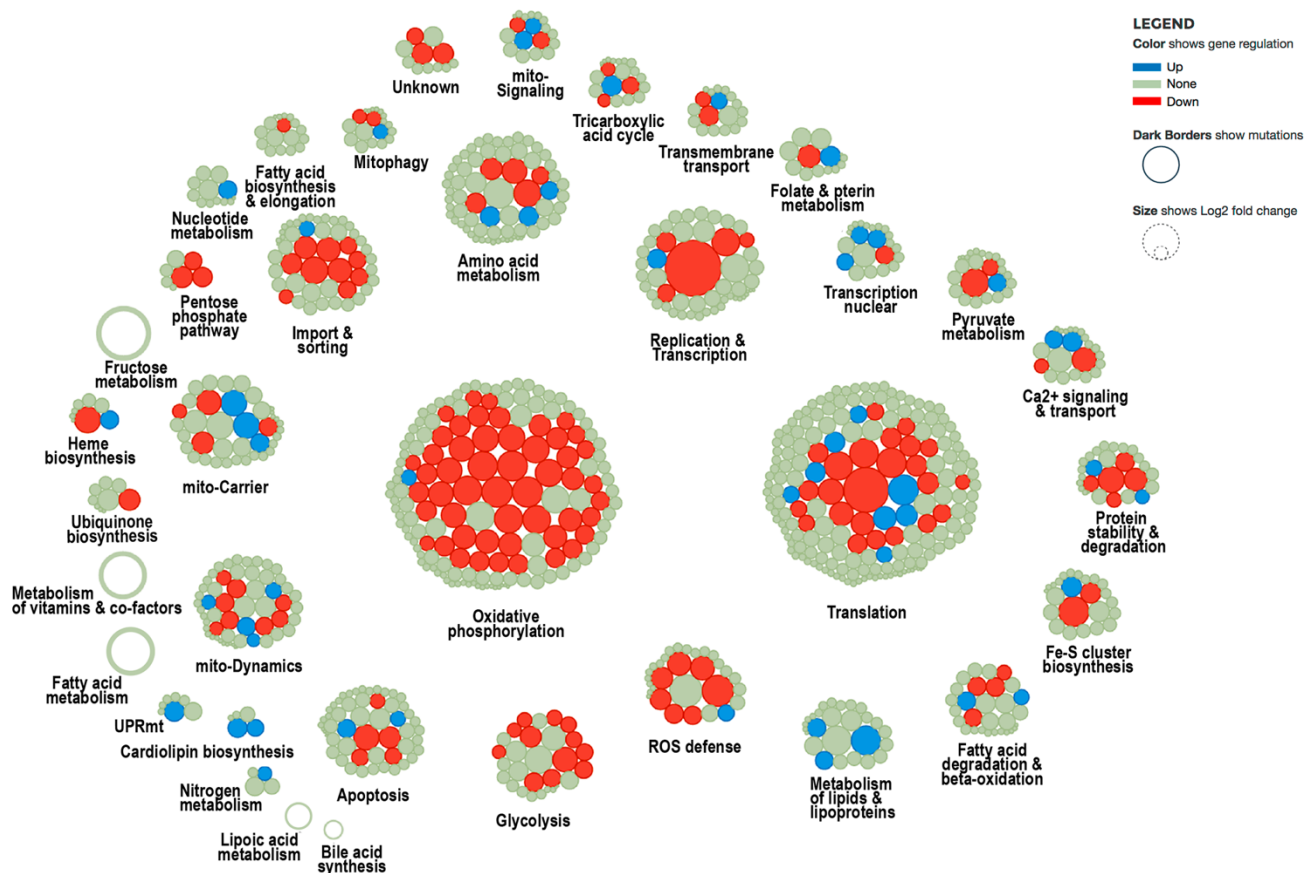

**Supplementary Figure 1. Interactome view of 36 mitochondrial processes within the DEGs.** Striatal DEGs are distributed in 31 mitochondrial processes, especially within oxidative phosphorylation, translation as well as replication and transcription. Individual bubbles represent genes of a process; blue and red, indicate up- or down-regulated genes within a process, respectively. Bubble size indicates log2 fold change values. This scheme was built using the “Interactome View” tool available on mitoXplorer web-plateform <http://mitoxplorer.ibdm.univ-mrs.fr/index.php>.
